# Supplementary material for: A Serological Multiplexed Immunoassay (MIA) Detects Antibody Reactivity to SARS-CoV-2 and Other Viral Pathogens in Liberia and Is Configurable as a Multiplexed Inhibition Test (MINT)
Source: MDPI journal article supplement (doi:10.3390/immuno4010007), 2024-03-03
Supplement: s1 [file s1]

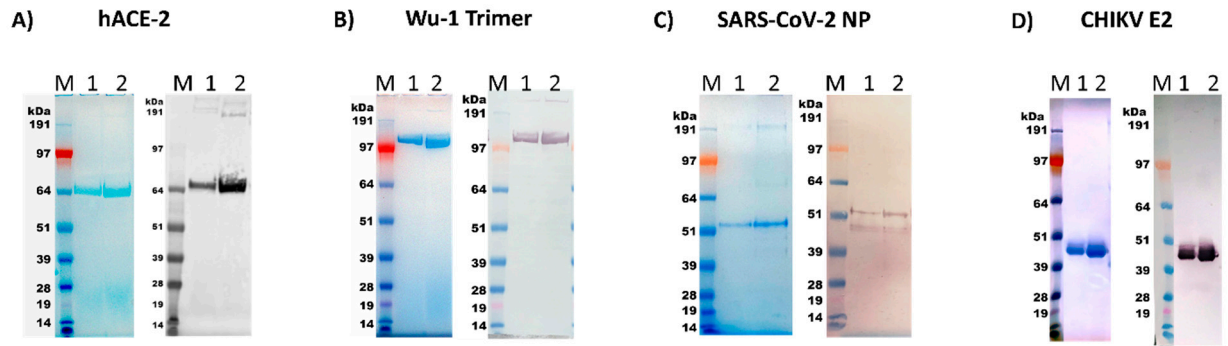

**Figure S1.** SDS-PAGE Coomassie Stains and Western blots of Purified, *Drosophila* S2 cell-derived, recombinant proteins of A) hACE-2, B) Wu-1 Trimer, C) SARS-CoV-2 NP and D) CHIKV E2. Western blots were detected with 6x-his tag monoclonal antibody (1:10,000 dilution), mAb CR3022 (1:1000 dilution), human SARS-CoV-2 convalescent sera (1:500 dilution) and human CHIKV convalescent sera (1:500 dilution), respectively. Purity of each protein based on the SDS-PAGE is estimated to be about >80%, >90%, ~60%, and >90%, respectively. M: Marker, 1: 1  $\mu$ g, and 2: 2  $\mu$ g of protein.
